# Supplementary material for: From reporters to endogenous genes: the impact of the first five codons on translation efficiency in Escherichia coli
Source: bioRxiv preprint, doi:10.1101/699900, version 2 (2019-08-01)
Supplement: Supplemental Table 1 [file 699900_file02.xlsx]

## Sheet: Planilha1
Sequence	Score
ACAATCGCC	1
ACACCTTGC	1
ACAGCGCCT	1
ACCCAACTG	1
ACCCCTTCA	1
ACCTCTTCA	1
ACCTTTGAA	1.22222
AGCCCCGTA	1
ATGCCCTCC	1
CACCGCCCA	1
CACCGTACC	1.10526
CACGACCCA	1
CACGTGGCC	1
CACTATCCG	1.18182
CATCTCGCC	1
CCACATGGG	1.125
CCACCGCGA	1
CCAGCGCCG	1
CCATCTGGG	1
CCCAGCACT	1
CCCAGTACA	1.14815
CCCAGTACC	1.125
CCCAGTGGC	1
CCCCGTGGA	1.08333
CCCCTCGCA	1
CCCCTGAGC	1
CCCGCCCAC	1
CCCGCCTTT	1
CCCGCTCCC	1
CCCTGCGAA	1
CCCTGGGCC	1
CCGCCCTAC	1
CCGTTCATC	1
CCTAGCTCA	1
CCTATCTTA	1
CCTCATGGG	1
CCTCGCCGC	1
CCTGCTTTT	1
CCTGGTCCG	1
CCTGTGGAC	1
CCTTCTTTA	1
CCTTGTGCC	1
CGACCGTCA	1
CGCCCTCGC	1
CGCCGTCCA	1
CGCGCCCCG	1
CGGTGCTCC	1
CGGTTCCCA	1
CGTGCCTCC	1
CGTTCTTCA	1
CTCCCCCCC	1
CTCCCCCGT	1
CTCCGCCAA	1
CTCCTGGTC	1
CTCCTTGCT	1
CTCGCAGCG	1
CTCGGTGAC	1
CTCGTCAGC	1.06667
CTCGTCCCC	1
CTCGTCCGA	1
CTCGTCGCA	1
CTCGTCTTC	1
CTCGTGACC	1
CTCGTGGCC	1
CTCGTTATC	1.08696
CTCGTTCCT	1
CTCTGGCCC	1
CTCTTCCTA	1
CTGGATTCA	1.13333
CTGGCCCCT	1
CTTAGCCCG	1
CTTCCCCAT	1
CTTGCCGTG	1
CTTGCCTGT	1
CTTGCGCTA	1
CTTGCTTCG	1
CTTGTCCCT	1
CTTTGCCTC	1
GACCCGCCG	1
GCACTCCTC	1
GCCAAGCCC	1
GCCCCTCCG	1
GCCCTCTGC	1.03774
GCCTCTCCA	1
GCCTGCCTG	1
GCCTTATCC	1.16667
GCGTCCTCT	1
GCTCCTTGC	1
GCTCGCTCA	1.16667
GCTTCTCCC	1
GGACTCCTC	1
GGCCCTTCC	1
GTACCTCCA	1
GTCCGTCCT	1
GTCCTATCC	1
GTCCTTGCC	1
GTCGCCATC	1
GTCGCTCCA	1
GTCGTCCCA	1
GTTAGACCT	1
GTTCTCCTT	1
TCCACTGCG	1.16667
TCCCCGCCT	1
TCCCGCGCA	1
TCCGGTGAC	1
TCCTCACCG	1
TCCTCCAGT	1.11765
TCCTCGACA	1
TCCTCGCTT	1
TCCTTCGAA	1
TCCTTTCGC	1.16667
TCCTTTGCC	1
TCGTATCCG	1
TCGTCCAAC	1
TCTCCCGAT	1
TCTGTTCGC	1.10526
TCTTCGCTC	1
TGCACCTCC	1
TTCGGCTCC	1
TTGCTGCCA	1
TTTCACCCA	1
GAATGCCGC	1.01818
GCCATGCCA	1.02174
GCCCCTGAG	1.02857
TCCAAGCCT	1.0303
ACTACCCGA	1.06084
CCTGCAGAT	1.03704
CCCCATGTA	1.03846
CTCGCTAGC	1.04255
GCCCCACCC	1.04255
GGATCCCCA	1.04444
CATGGCACG	1.04878
GTCCTTCAC	1.05
CTGGCCCGG	1.06266
GCTGCTCCA	1.05263
TCCGCCCGG	1.05405
GAGTCCCCG	1.05479
CCACCTGGG	1.05495
CTCGACCTA	1.15936
CTTGCGCGG	1.05556
ACTGCAGCC	1.05882
GCCCTAGAA	1.05882
GCCGTGAAC	1.11513
TCGCGTTTC	1.1683
CATGGGACA	1.06024
CTCGTCCGG	1.06061
CCGCCCGGC	1.0625
GGATCTCCG	1.06452
CTCCTAGAA	1.06667
CTTGGCCCG	1.06667
GCCGCCTCG	1.06977
CTCGCCGGG	1.07
TTTGTCCCC	1.07143
CCGCCCTGG	1.07407
CGGCTCTTC	1.07407
GCTGGCTCC	1.075
CCTCGTACA	1.07692
GCCACTCTA	1.21703
CATGCCACC	1.08333
CCGTCTAGA	1.23397
TTCTCCAAA	1.08333
CACATGACC	1.08571
CCTATCGAG	1.08571
AATGGCCCC	1.08696
CTATTCCTA	1.16848
TCTGGCTCG	1.12858
CCCAGGAAC	1.08824
CCGAGCTCG	1.08824
CCTTCCGTA	1.08824
GCCCGTCTG	1.08824
GCCTTCCTT	1.08824
GTGCCTCCG	1.08929
CCCCTGGGC	1.17589
CTCGTCTTG	1.09091
CTTGGCTCG	1.09091
CTTTGTCCG	1.09091
GCCCTAGGG	1.09091
GTCGCTCCC	1.09091
CCATCCGGG	1.09231
CGCGCTCCA	1.09375
GGCCGTCCG	1.09434
CCATCTATG	1.09524
CTTGACTTG	1.09524
CTTGCGACA	1.18398
CCGTGGGAA	1.09783
CCTTGTGAG	1.1
CTCGGGACC	1.1
CTTGGGTCA	1.1
CTTGGGTCC	1.1
CTTTACCAG	1.1
GCTTGTCCG	1.1
GTCTTCTTC	1.10256
ACCGTCCCT	1.10526
CCGTGCTCC	1.20263
CCCGCCGAT	1.10714
CCTTTGAGA	1.2079
CGCGTGAAC	1.10976
CTGAGCCAC	1.11111
GGCGCGCCC	1.11111
TACCTTTAC	1.30556
CAGTTCGCC	1.11364
CTCCACGAA	1.11538
CTGCATGGA	1.18732
GTCGCTCCT	1.11538
CGGCTCGTC	1.11628
CCCCCTAGA	1.22549
GGTACGCCC	1.11765
TCACCCTTA	1.11765
TCCGCGCCA	1.11765
CCCTCGGGG	1.12882
CTCGCATGG	1.11864
TGGATGACC	1.11864
CTTCGTCAG	1.12
CTCGTCTGT	1.12121
CGCCTCCTG	1.125
GCACGTCCC	1.125
GGGCAACCG	1.10974
GGGCCTCCA	1.125
GTCCTCTTC	1.125
TCCTCCGGG	1.125
TCGCGCTAC	1.125
TGCCTCGCA	1.125
CTTGTGGCC	1.12727
CCGGTGAGC	1.12821
CTCGATCCC	1.12821
CTCTCGGGG	1.17886
CCGTTTACA	1.14916
CCGCCCAGG	1.13043
CCTCGTGCT	1.13043
GTCCCGTCA	1.13043
ATGGCTCCC	1.13333
TCCGTTTCT	1.13333
TGTCGCCTG	1.25417
CCCCGGAAC	1.13636
GCCCTGAAG	1.13636
GTCCTTCTC	1.13636
GTCGTGCCC	1.13636
TCGTCCGAT	1.13636
CAGGTGGAC	1.13761
TATCTCCTT	1.13793
CGGCTCCTG	1.13889
GCTGCTACC	1.13889
GGTTCTCCG	1.13953
ACAGGTCCC	1.14286
ACCCTTGTC	1.14286
ACCTCGTCG	1.14286
CAATCCGCC	1.14286
CATGCCTTA	1.14286
CCGGTGTGC	1.14286
CTACCGGTG	1.14286
CTCGTCTTT	1.14286
GCAGAGACC	1.14286
TTCCAAGCA	1.19643
CGTGAGGAC	1.14634
CCCGGGCAC	1.14706
GTGTTCCTC	1.14773
GATGCACTT	1.2136
CCCCTGCTG	1.24167
CCCGTTCCT	1.15
CTTGTCGCG	1.15
GCCGTGCAC	1.15
GCCTTGTGC	1.15
TCCACCGTA	1.15
TCCTCCCGG	1.15
TGTATCCAA	1.15152
CGCTTTCAA	1.29121
CTCGTCTAT	1.15385
GCATGGACC	1.15385
GCCTGCCCC	1.15385
TTGACCCCC	1.15385
CCCTGCGAG	1.19734
GACTGGACC	1.15625
GCTCAGCGA	1.15625
ACCCTAGCC	1.15789
ATTGTCCGA	1.15789
CCCGCCTGC	1.15789
CCCTTGTGG	1.15789
CCTTGGCTT	1.15789
CGCCCAAGG	1.15789
CTCATGGGA	1.15789
CTTGTCTGT	1.25395
GTCCCTCCG	1.15789
TCCGGGGAC	1.15957
CTCGTTCGC	1.16
TCCACTGTA	1.19765
TCCCACGTA	1.16
GCAGTCCCA	1.16071
GCCCGACCC	1.16129
GGCCCGACC	1.16129
CCCGTGGAC	1.16176
ACAGCTCGT	1.16216
CCCGGTTGC	1.16393
CCGGTGTAC	1.16667
CCTTGGGAC	1.16667
CTCTGCTCG	1.16667
CTCTTCCTG	1.16667
CTGTCGCCT	1.16667
GCCTACTCC	1.16667
GCCTCGTTC	1.16667
TCTATGCAA	1.3291
TGGCCATCC	1.16667
TTCCTGCGC	1.16667
CGAGCAGCA	1.16949
TTCTCGCGT	1.16949
ACGGACGAC	1.16981
GTCCTTGGA	1.17073
CGCGAACGC	1.17308
CTCTCCTGT	1.08696
GCCACTCGA	1.17391
TTGGCCCTG	1.17442
GCCCTCTGG	1.175
CATGCGTTA	1.28268
CCCCCAAAG	1.17647
CGCCGTAAC	1.37771
CTCTTCGTC	1.17647
CTTGTGACC	1.17647
GCAACTCCG	1.17647
GCAGCTCGA	1.28268
TCCTCACCT	1.28268
TTTTGCACA	1.17647
TCCTCAGTA	1.30595
CCGTGGGAC	1.18
CCAGCCCGT	1.18182
CCCCGCCGA	1.18182
CCTAGTTTG	1.23797
CGCCAATCG	1.18182
CGCCCATTG	1.18182
GCCTCCGCT	1.18182
GCTCCACGC	1.18182
GCTCCTTCT	1.18182
GTCCTCCGC	1.18182
TCCTTCCAC	1.18182
CTTGGCCAA	1.18367
GGGCTCCCC	1.18421
GCGCTCCTT	1.18519
GGGCCGACC	1.18519
GTCCGCTCC	1.18519
TCTTGCGTA	1.22939
GGGTGCTCC	1.18667
CGCTGTTCA	1.1875
CTATACTTA	1.29963
GTCCCGCCT	1.1875
TCCTTCTCA	1.1875
GTGTCGTCC	1.18831
GCGGTGGAC	1.18847
CTCGTTCAG	1.23933
CTGGGGACC	1.18966
CCTAGACTT	1.19048
CCGTATGGG	1.19084
GCCATTCCA	1.19149
CCTGATCGG	1.19231
GCAGTGACC	1.19231
CTTGTGGGA	1.19588
CCTGGCCCA	1.19608
ACATGGGAC	1.2
AGCCCTAGA	1.37273
AGCTCGTCT	1.42353
AGTCCTGCC	1.2
ATCCTCGTG	1.2
CCCGTTCCA	1.2
CTTGACGCG	1.2
CTTGTGGCA	1.2
GGACCGTCC	1.2
GTCCAGCTT	1.2
GTTTCCGCC	1.31875
TCGCCTGAA	1.29048
TTCGTCCTA	1.2
CCGTGGGTA	1.21616
TCGTTTGCG	1.20213
CCCAGTGGG	1.20225
GTGCTCCGA	1.20588
CATAGTCCG	1.20833
CTCTCATTA	1.28417
GCCCTAACG	1.20833
GCCGCCCCG	1.20833
GTGTATCCA	1.29715
ATGCCTATG	1.24319
GTCTCCCTA	1.21053
TATCGTTCA	1.21053
TTCGCCGTC	1.21212
GCGTCAACA	1.21277
CCGGTGTTC	1.2132
ACTCGCTCA	1.21429
CAATGGACC	1.34048
CACGTCCGA	1.21429
CCTCCAGGG	1.21429
CGACTGTCT	1.45089
TACCCTGGA	1.21429
TCCTCCAGG	1.21429
TCCTTGAAC	1.21429
TGCCGCTCC	1.21429
TGCCGTCCC	1.21429
GGAACAGCA	1.27769
CGCTCCCCG	1.21739
GGCTCGCAC	1.21739
CACGGATGG	1.21831
CGTTCCGCA	1.32996
TACGTACCA	1.27604
CATGTCGTA	1.17226
GTCTCCTCG	1.21951
GTGCTCCGT	1.21951
ATGGTGAGC	1.22172
CAGATCCGA	1.22222
CGCTACTTA	1.32164
CTCGTCGCG	1.22222
CTGGCGGAC	1.22222
GCCAGCCCG	1.22222
GCGCCCGTA	1.28968
GCTTCGCCG	1.11111
TGTCCGCTT	1.28968
TACATGGGT	1.21286
CGACCCAAG	1.22449
ACGAACCAA	1.27104
AGCGCCGCC	1.225
CACACTCTA	1.225
CGTCTCCTT	1.225
CTGAGTGCC	1.225
CTTGTGTCG	1.27104
CACACGGTG	1.22581
TTTCCGACG	1.22581
GCCAACTTA	1.22727
CCTAACGGG	1.22785
GCCGGACCC	1.22857
GCCGCCTGG	1.23009
ACGCCCAGC	1.23077
CCAACACGG	1.36538
CCCGAACTA	1.3227
CCCGTCGGA	1.23077
CCTCCTCAG	1.23077
CCTTGTGAA	1.36538
GCCCCAAGC	1.27788
GCCTCACTC	1.23077
GGGCGCCCC	1.23077
GTCACTCCC	1.23077
GTGCTCCTT	1.23077
TACCCGCGC	1.23077
TTTACCAAG	1.36538
CCCTTCGGG	1.27537
CCGGGAGCC	1.23256
CCCGGCTCA	1.23333
GTCGTCGAC	1.23333
CCAGTTGGG	1.26257
CCTTTTGAA	1.33987
CGCGAACCG	1.23529
CGGCCCTTG	1.23529
GCCCCCTTG	1.23529
TTCCCTATA	1.17825
TTCTTACGA	1.23529
GCCCGGTGC	1.28765
GGACCTCCA	1.28509
ATATCCCTA	1.14405
CTCTCTTAC	1.2381
TCGATTACG	1.32359
CGTTCCTTA	1.23881
CACGAAGGA	1.41091
CATCGCTGT	1.37926
CGCGCCCGC	1.24
CTCGCCATG	1.24
GCCCCTGTA	1.24
GGCCTCCCG	1.24
TCTAGCTGC	1.24
CGGCTGAAC	1.24138
AGCCCAAGG	1.24176
GTTCCCTCC	1.24324
CCCGGTGGG	1.2454
GTAGCTCTG	1.24627
CCGTGGGCA	1.24771
CTATGGGTA	1.23906
ACCCGGGAC	1.25
ATAACGTCC	1.25
CCATACGGG	1.25
CCCCTGTGG	1.25
CCGTCGCGA	1.25
CCTTGGATC	1.25
CCTTTCGGG	1.25
CTTGCAAAG	1.25
GCCCCTCCC	1.25
GCCTCCTTG	1.25
GCTCTTGGC	1.25
GCTGCTCCC	1.25
GGCTCTCCT	1.25
GTACCTCGC	1.25
GTACGCTCA	1.25
GTATCCTCG	1.18952
GTGCGCCCA	1.25
GTGGCTCCT	1.25
TACCCCTCG	1.25
TCAGCACAA	1.25
TCTCTCTTA	1.31466
TTAGCACTC	1.375
TTCTTGCTC	1.25
GCGCCCGGC	1.22676
TTCGTCCTC	1.25373
CGTTTTGCT	1.29836
GCTCGTCAA	1.30321
CCCCGGTGG	1.25676
CCTCTAGGG	1.31653
CTCGCGGGG	1.27006
GACTCTACA	1.37146
GCCTTGAGA	1.25806
GTGCCCCGA	1.25806
TTGAGGACC	1.25806
CTTGCAGCG	1.25926
CCGGCGGAC	1.26016
ACGGCTTCA	1.26087
CCAACCGGG	1.17589
CCTTTGCGC	1.26087
GCCGGCCAG	1.26087
TCCTGGCTC	1.26087
CTTGGTCCG	1.2619
CCCAAAGGG	1.26316
TTGCCTGCC	1.26316
TCCGCGCTC	1.26415
TTGCATGGA	1.29874
CCCCGGTCG	1.26471
GCCGCCCAG	1.26471
AAACCGTGC	1.26667
AAATCGCCA	1.13333
CCGAGCACC	1.26667
CCGCCTACA	1.26667
CCTACCGGC	1.26667
CGAGCTCGA	1.26667
CGCCTTCGG	1.26667
CCGGTGGGC	1.26812
GGGGACCCA	1.26904
CATGCCCCG	1.26923
GCTCACATA	1.19462
ACAGTTGCA	1.3659
CTTGCAGAG	1.27027
GGCGGCTCC	1.27027
ATTACCCCC	1.27273
CCACCCCGT	1.27273
CCCGACGCT	1.27273
CCGGGACAC	1.27273
CGCCCTGGG	1.42803
CGCGTCACT	1.27273
CGGCGGACC	1.27273
CGTGCCGAC	1.27273
CTCGACTCG	1.27273
CTTCTTACC	1.27273
GCACGTCCG	1.27273
GCCCGTGAT	1.27273
GCCGGCCCC	1.27273
GCTTCTCCG	1.27273
GTCCACCAC	1.27273
GTCCTGTCC	1.27273
TATCCTTCA	1.27273
TCCGGCCAC	1.27273
TCCTCACAG	1.27273
TCCTCACGA	1.27273
TCGCCTTCT	1.27273
TCTTTCCCA	1.27273
TTCTGGACC	1.27273
GGGCACCCG	1.30376
CCTCCGGGG	1.27451
CGTAACTTC	1.32043
CCGCAAGGG	1.27551
CTAGCCCCT	1.27607
TCCTTCAGT	1.27692
ACCCCGTTC	1.27778
CCTACGACG	1.27778
CCTGCGGAA	1.27778
CCTTGGGTA	1.27778
GTCGCCGTC	1.27778
TTCTTTACA	1.1683
CTTGCCGGC	1.27928
CCTCCAATA	1.28
CCTGGGACC	1.28125
GCCCGCTCG	1.22127
GCTCGGCAT	1.28125
GTCCTTCTG	1.33759
TCTTGCGCG	1.28125
CTCGTCTGG	1.28169
CCTCAGGGG	1.28205
CGCTGGACC	1.28205
TTCCCTATG	1.32853
GGGCTCCGG	1.30916
CATAGTGCG	1.32286
CCAGTGAGC	1.3183
CCGGTGCTC	1.14286
CGTGCCATG	1.28571
CTCCGCGTC	1.28571
CTCGTCGTG	1.28571
GCACCATAC	1.43233
GCCACAGCC	1.28571
GCCGCGCCG	1.28571
GCTCTTCTC	1.28571
GGCCTCGCA	1.28571
GTAATGACC	1.28571
GTCTCCGAG	1.28571
TCCTTCATA	1.40952
CGTGTGAAC	1.28774
TCCGGTGGC	1.28846
GTACTCCTC	1.31124
CGGACCGGC	1.29032
CTGCCTCAG	1.29032
TCCCACGCG	1.29032
TCCGTTCGG	1.29114
CATCGCAAA	1.36583
CGCCGGGCC	1.25222
GTCGACGCC	1.29268
TTGGTGAGC	1.30551
CACAGTGTA	1.27402
AGTCCGTCC	1.39706
CGGGGCCCA	1.48916
CGTTCTAAC	1.29412
CTGCCCGGG	1.29412
GCAGGCTCC	1.39706
GGTCCCCCC	1.29412
TGCGCAAAC	1.29412
CACGCCCGT	1.29545
CGGGGCCCC	1.29545
CGAGGCTCC	1.2963
CGTATGTTC	1.19151
GGGCAGCTC	1.41447
ACCGCGTCC	1.3
CCCGGCCCA	1.3
CCCGTCTTG	1.3
CCCTCGTTC	1.3
CCGCCCCAT	1.3
CCGCTCTCA	1.3
CCGGTCGTC	1.3
CCTTCCTCC	1.3
CGCTCGCGG	1.3
CTTACCCAT	1.46818
CTTGCGGAG	1.3
GACCCCCCG	1.3
GATCTCCCA	1.3
GCACTGCCG	1.3
GCATGCGCG	1.3
GCCAACCCC	1.3
GCCGTCCTG	1.3
GCCTTTCCC	1.3
GGGTTCCTC	1.3
GTACTCGCC	1.3
GTCATGCGC	1.3
CGGGTGAAC	1.28982
CGGTTGAAC	1.30108
AGCAACTCG	1.25831
GCTCTCCCC	1.30303
CTTCTAAAG	1.30435
TTCATGGGT	1.32451
CAGCTCGGA	1.30556
GCCGGCCTA	1.30556
CTCTCCCCA	1.30612
GTAGTCCCG	1.30682
CCGCTCAGT	1.30769
CCTTCGCCT	1.30769
CTACGTCTT	1.43956
CTTACATCA	1.15385
CTTTCTACG	1.30769
GCACGTCAC	1.30769
GCCCGTACT	1.30769
GCCTGGCCT	1.30769
GCCTTGCTA	1.30769
GTACCCAAT	1.30769
GTCGTTCTT	1.3628
GCGCGACCA	1.30952
GCTCTTGCG	1.30952
CCTTTCGGC	1.24446
GAACGCAAA	1.41061
GACTGCTCC	1.31034
GCAGCGCCT	1.31034
CCCGGGTGC	1.31081
CCTTGGGCC	1.31111
GCATGGGAC	1.31111
TGCAACCGT	1.31111
CTTGTGCCG	1.31183
CACCCGGAC	1.3125
CACTGTTTC	1.42096
CCCTTCGGC	1.3125
TTCACGTTC	1.3125
TTCGCGACC	1.3125
TTGCCTGAG	1.42096
TACATGGGG	1.32577
CTGCCATCC	1.31429
CCCCAACTG	1.31579
CCTAGCGTA	1.31579
GCAGTCCCG	1.31579
GGCCCGCCA	1.31579
TTGGTGGAC	1.31618
ATTATGGCC	1.31707
TCCGGTGTC	1.31707
CCCCAAGGG	1.31818
CGCTTCGTA	1.31818
CTTGCACGT	1.31818
GCATCGCTC	1.31818
GCCAGCCTC	1.23052
GGGGTCCTC	1.31818
TCCGACGTA	1.31818
CTCGTCAGG	1.32
GTCGCACCA	1.32
TCAGCCTTC	1.39077
GTCGTCCGC	1.32143
TTCGCTCTA	1.32143
CGAGTGGAC	1.32222
CTCCTTGAT	1.32258
TGGGCCGAC	1.32258
GTGCTCCAA	1.32407
CCGTGGGGG	1.32436
CCCAAGGGG	1.32558
CGTATGCCC	1.36734
CCTGGTGGG	1.32609
GTCGTCCGG	1.32609
GTCGTCCGT	1.36517
TTGCGCGTA	1.28827
CGGGCCGAC	1.29091
CTGGCCCAG	1.32727
GCATGGGTA	1.34066
GGGCCGCCT	1.32941
CGGCTCGCA	1.33028
ACACCCAGC	1.33333
ACATGTGCC	1.33333
ACCGGAACA	1.54902
ACTACACGG	1.47436
AGCTCCGGC	1.33333
ATTGTCCCG	1.33333
CAGCGGACC	1.33333
CCATCGGGG	1.33333
CCTAGCTTA	1.22549
CGCCTGACG	1.33333
CGCGCCCAG	1.33333
CGGCCCACC	1.33333
CGGCCGAAC	1.33333
CGGTGGTCC	1.33333
CTCCTTCTG	1.33333
CTCTCCCGA	1.33333
CTTCGTTCA	1.33333
CTTGGCCAG	1.33333
GCCCAAACT	1.33333
GCCCATCAG	1.44792
GCCCTGGTC	1.33333
GCCGCTAGT	1.33333
GCCTGGCTC	1.33333
GCGCCGCCA	1.33333
GCGCTCCCG	1.33333
GCGGCCCAC	1.33333
GGCACCAAT	1.33333
GGGACCGCC	1.33333
GGTAACACG	1.37597
GTCCAGCCT	1.41667
GTCGCCGCG	1.38725
GTTCACACC	1.33333
TCCTCGTGT	1.33333
TCCTGGTCT	1.33333
TGCCCTACC	1.33333
TTACCCGGA	1.39881
TTGCCCGCG	1.33333
TTTGCCTCT	1.33333
GCGGTGGGC	1.42984
CGAAATTCT	1.33621
GGGTCGAAC	1.37593
GGGGGCCCG	1.33174
GCCCCCATA	1.33824
CCAGTGGAC	1.33898
GGGGCGTCC	1.33918
GTGGGTGCC	1.33957
CCCGGCGGG	1.34028
CGACTCTCA	1.30065
CGTTGGACC	1.34043
AGCAATCCA	1.25379
CTCGCTAGG	1.38157
TCCGCAATA	1.34146
CCGTCAGGG	1.34483
CTCGCTGGC	1.27956
CGCTACATG	1.34524
CTTGTGCTG	1.40957
CACCCGGTG	1.34615
CCGTTACGA	1.41382
GCTTCCTCA	1.34615
GGACAGCTC	1.34615
GTCTCTGCA	1.34615
TTAAACCTG	1.41382
TCCTTCCGA	1.38347
CCGTCCTCA	1.34783
TCGTTCCAA	1.42391
TTCTCCGAG	1.34783
CCAGATGGG	1.34848
GGGTGGTCC	1.34975
CCAGGATCT	1.35
CGGCGCCCG	1.35
CTACGACAT	1.51591
GCCCCCCGA	1.35
GCTTCATCA	1.25395
TTTACTTCC	1.25395
CAGGTGAAC	1.417
CTCTCTCGG	1.35185
ACCGATACA	1.35294
CCCCACGGG	1.35294
CCCGGTGCC	1.35294
CCGCATATA	1.45425
CCTTGTGGG	1.35294
GCGGCCTCT	1.35294
GTTGCGACC	1.35294
TGGATTCCC	1.35294
TTCTGGACA	1.35294
TTCTTCTTT	1.23897
CCTAGTCGA	1.35484
TTCTCCGCT	1.35556
TGTGACACA	1.57349
AGCACCATC	1.47857
CCCGGGGCC	1.35714
CCCGGGTCC	1.35714
GGGCGCCCA	1.35714
CCAAGTGGG	1.41099
GATCGCTCC	1.35897
CCGATGCGC	1.43
GTCGCTCAG	1.43
TCCTGGTCC	1.36
TGGCCCTCT	1.36
CGGGCTCTG	1.36066
CCTTGGGGG	1.36095
CCCTGGTGG	1.36134
ACCGGTGAC	1.36264
ACGGACATA	1.41711
CCTAGTTAT	1.36364
CGACCTCCT	1.18182
CGCCTTGGC	1.36364
CGTCCACCA	1.51515
CTGGACCCC	1.36364
GACTCCTCT	1.18182
GCCCCGCCG	1.36364
GCCCGTGGG	1.36364
TGCCTAAGC	1.36364
TTCGCGCAG	1.36364
GTCGTCCAC	1.36585
GTTGGCCCT	1.36585
CCCCGAGGG	1.36667
CCTGCTAGG	1.36667
ACGACGACA	1.41498
CACGTTCTA	1.26754
CCTATAGGG	1.36842
CTCTGCCTG	1.36842
GCCCAATAC	1.36842
GCCCTAAGA	1.31935
GCGCATGCG	1.36842
GGGGGCTCC	1.37477
TGTCCCCTG	1.36842
CACTCAGGT	1.39674
CCGATACGT	1.40819
CTCGCGGTG	1.36957
ACATGGGGC	1.36975
CCGGCAGGG	1.37037
GATCCGCCT	1.43519
GCCCGGTCG	1.31048
CCCTTGGGG	1.4695
TACCGGACC	1.37143
CGATTTCCA	1.52647
GTGGTGGAC	1.37628
GAGGTGGAC	1.37531
AATCGCACG	1.51442
AATTTCTCC	1.375
ACATGCCAA	1.2962
ATTCCCTGG	1.375
CAAACCGAC	1.48162
CACAGGACC	1.2962
CCGTCCTCC	1.375
CTCGCGCAG	1.375
CTCGTTTCA	1.375
GTCCTCTTT	1.375
GTGCTCGCA	1.375
GTTCCTCGT	1.375
GTTTGCCCC	1.375
TCCGGATCC	1.375
TCGTTAGAG	1.32853
TGGGCCCCG	1.375
TGCATGGGT	1.38349
GGTCAGCCG	1.37647
TGCTGCCCA	1.37662
CCGGTAAAC	1.37681
GCCTCCTCC	1.41715
CCGGAGACC	1.37838
ATACTCCCT	1.40999
CTTGGCCTA	1.37931
TCCTTGTTA	1.37931
CCTGGTGGC	1.38
ACCGCTAGT	1.38095
CCGATCACT	1.29048
GACCGCCCT	1.38095
GTCGCAACC	1.38095
GTCGCCTCT	1.38095
GTCGTCCAT	1.38095
GTGTCTCCG	1.4632
TCAGTCCCA	1.38095
TCCCACATT	1.38095
TGGCCGTCC	1.4632
GCCCGGGGG	1.56142
GGGGCCCCG	1.38129
GAGCCTAAA	1.38182
AGATCTTCA	1.38235
ACCCACCTG	1.38298
CACGTCACA	1.38462
CAGCGTTCA	1.38462
CCGGACCGC	1.38462
CCTTGGTAT	1.23397
CGACTCTTG	1.38462
CGCCTAGCC	1.38462
CGCCTCGTC	1.38462
GCTAAACCC	1.38462
GTTGCCCCC	1.38462
CTCCGTGGG	1.38525
CTCGTTGGG	1.38655
GAGGTGAAC	1.40161
ACTCATGAA	1.54649
TCCTCGGGA	1.35013
CCCCCTGGG	1.38889
CGCGCTGCC	1.38889
GGTCCACCC	1.38889
TCCTTCGGG	1.38889
GCCGCGTGC	1.38983
TTCGAACAG	1.41992
CTAATGCCG	1.34512
GCCATCGCT	1.34512
GTCCCGGCC	1.39024
CACACCCTA	1.3913
CACCCGAGC	1.3913
CTCGTCATA	1.3913
CTTGCGGGA	1.3913
CTTGGGCCG	1.3913
GCCCTCAGC	1.3913
GTCCCCGAA	1.3913
TATCGGCTA	1.53565
AGCCCCTTG	1.39394
CCGCGATCG	1.39394
CCTCAAAGA	1.44697
GTCCTTGAG	1.44697
GCGGCCCCG	1.39437
ACCGATGCA	1.39623
GACATGGGG	1.40274
GCCCCTCGT	1.39683
AATTTGCCG	1.5125
AGCGATCCG	1.5125
AGGCTTACC	1.4
CCACTGGGG	1.48571
CCCACGGGC	1.4
CCCGGTCAC	1.4
CCGGCCCTG	1.4
CGGTGGACC	1.42727
CTCAATGCA	1.4
CTCGCGGGA	1.4
CTTACTACA	1.24348
GCACTGCTT	1.56364
GCACTGGCG	1.4
GCAGCGCCC	1.5125
GCCCAATCA	1.4
GCTCACCCT	1.4
GGGCCCTCG	1.5125
GGGGTACCG	1.38792
GTCGTCCTC	1.4
GTTCTCGTC	1.45806
TCATCGTCA	1.48571
TCCTTCGGT	1.4
TGTCTCCAA	1.30526
TTACCCTGG	1.4
TTCATGCTC	1.4
TTGGCCCCT	1.4
TTGGCCCTA	1.5125
CGGGTGGAC	1.40062
GCCGGTGGC	1.41631
CGCGAATGC	1.42002
ACGCTTTAT	1.36859
GCCGGGCCC	1.44657
GCCTGTCCT	1.40541
ACCGCCCGG	1.40625
GGGTACCCG	1.44292
TGGGCCTCC	1.40625
ACTGCGATA	1.2637
CATTCGCAG	1.33832
GCCTTAGCA	1.47156
TTCCCCCAG	1.40816
TTCCGCCGC	1.40816
TCATGGGTC	1.45765
GGGGGCGCC	1.40848
CTTGGGGTC	1.42771
CCGACTGTC	1.55871
GCCTTTATC	1.40909
TTCGCTCGG	1.44899
CCGGGGAGC	1.41683
CCGGACGGG	1.40979
GTGGCTCTA	1.37808
ATTCCCGGG	1.51144
CACTCTGGA	1.41176
CTAGCTAGG	1.51144
CTCACCCCA	1.41176
CTGCCCAGG	1.51144
CTTGCGTGG	1.41176
GACTGGTCA	1.60062
GCCCGGGGA	1.42486
GGCCTCCTC	1.29963
TTCGTCCGG	1.41176
CCGCTGGGG	1.44696
CGCCCAGTG	1.41304
GTGACACCA	1.48777
GAACTCACG	1.47356
TGCGACTTA	1.41379
CACACTGTG	1.3883
CCCCGGGCT	1.41463
CGTCTGGTC	1.45732
GTGCTCCCA	1.41509
ACAGCTCTG	1.55449
ATTGTGCAC	1.36548
CCCCGGACC	1.41667
CCGGTGTCC	1.46509
CGTGCCCGA	1.41667
CTGGCCCCG	1.41667
CTTGTCTGG	1.41667
GCAGCCTCA	1.41667
GCCCCGAAG	1.41667
GTTCCTCCC	1.41667
TCCCTTGGA	1.55449
TCCGGTCAA	1.41667
TCGCACACA	1.41667
TCTTGCGAT	1.41667
TCGCATACG	1.41748
CTGGGTATG	1.43118
CACGGAAGG	1.41799
CCGAACGGG	1.4186
GTTGCTACG	1.4186
CCGGGGCCC	1.42105
CCTGAGCGG	1.45191
CTCCCCGAC	1.42105
CTTGTGATA	1.66507
GCCCGCCGC	1.42105
TCCTTCTGG	1.42105
CAAGGAAGG	1.44431
CGCATGGGT	1.43089
CGGCATGGG	1.42254
CCGGATGGG	1.42279
GCCCCGGAC	1.42308
ATGGCACCT	1.42391
CACCTGAAC	1.42424
GCATGGGTG	1.44212
CTCTTGGGG	1.425
CGTGGCTCC	1.42553
TCACGTCGG	1.46277
CCACTTGAA	1.45842
GTCGTCGCC	1.42593
ACGGACCAA	1.33929
ATTTCCCTG	1.54762
CCCAACAGG	1.42857
CCGGCGCCG	1.58385
CCTAGATTC	1.42857
CCTATGGCT	1.42857
CCTTCAGGG	1.42857
CCTTGCAAT	1.42857
CGGTTAACG	1.50974
CGTTCTCCA	1.42857
GCCTCGGCG	1.42857
GCTTTGCAA	1.42857
GGCCAGCCC	1.42857
GGCCTCGTG	1.42857
GGTCTCCTC	1.49015
GTAGCCTCG	1.42857
GTCCATCTA	1.42857
GTTCTTCTC	1.54762
TCACTTTCC	1.42857
TCGCCTAGA	1.42857
CAGTGGACC	1.43023
GCGCTCCTG	1.45269
TCGGTGGAC	1.43116
ACTTTGGAC	1.43182
TGCTCTCAA	1.43243
CCCCGGTGC	1.40311
GCCGCCCGG	1.37184
TCGCCGGAG	1.43333
AAAGCTCCA	1.43478
ACGGGCCAA	1.43478
GTAGCCCGT	1.40857
GTCCATCAC	1.43478
GTCATGGGT	1.41466
GCCCGTAGG	1.43636
AGCTTGCTG	1.43662
ACCTGCGGA	1.41875
ATCGCGACC	1.4375
CCCGCCAGG	1.4375
GCGTCCGTA	1.4375
GCTTCGTCT	1.4375
GGCCCATGC	1.4375
GTCGCCTCA	1.4375
TCAGCCCTT	1.54228
TCGCTCTGT	1.4375
TTACGCGCT	1.54228
TACATGGGA	1.48757
TTATTGACT	1.4693
GCGTCTACA	1.45042
GCCCCGGCA	1.44
GTCCGTCCG	1.44
GCCCAGGGG	1.44019
CCGTGGAAC	1.4403
GACGTTTTA	1.48804
AACCGGCAT	1.44118
GACATGGGT	1.44201
CTCGTGGGG	1.44253
TATCCGGCA	1.46527
GGGGCCCTG	1.44311
GCATGGGCC	1.44348
AGCCTATCC	1.22222
CCCCGTGGG	1.44444
CCCGTCCAA	1.44444
CCCTCAGGG	1.50794
CCGGAGAAC	1.44444
CCTGCGAGT	1.44444
CCTTGTACG	1.44444
CTCGTACTA	1.44444
CTGACGTCC	1.44444
GGCCGTCCA	1.44444
GGCGTCTCC	1.44444
GTCGCCGAA	1.44444
TTGCAAGCA	1.62222
CTGGTGTGC	1.44495
CTCGTTTCT	1.44595
CCTGAGGGG	1.44643
GCCCGAGGG	1.44643
CCTGTGGGG	1.44715
CCGTACGGG	1.44737
TCGCCAGGC	1.49291
TGCCTTGAC	1.44737
GCCCCGTTT	1.44872
TCTGTACCT	1.42317
AGTCTTCCG	1.45
CGCCGCCAG	1.45
CGGCTCCGC	1.45
TGCCTGCGC	1.48511
GGGTCCGAC	1.45181
AGGGTGGAC	1.46608
CGACTTGGA	1.52208
GCACTCCTT	1.45238
CTGGCCGGG	1.45401
ACGGCTCTA	1.45455
AGTGCCCCC	1.45455
AGTTCCCCC	1.60227
ATGCGCCCC	1.45455
CAACTCAGG	1.45455
CGGCCCTGT	1.45455
CGTATTGAC	1.51675
CTAGCTCTG	1.45455
CTATCAGGA	1.60227
GCCCCTGGA	1.45455
GCCCTCAGG	1.45455
GCTCTTCTG	1.45455
GTCCAGATC	1.45455
GTCTCCTTG	1.45455
GTGGTGAAC	1.44296
TACGTCCTC	1.45455
TCGCACATG	1.45455
TTAGTACCA	1.481
CCGGGCTCC	1.47984
GACGGCCCC	1.45652
TCAGCGCTG	1.40504
CCCTACCGG	1.45833
CCGATGAAC	1.45833
CTGGTGAGC	1.48259
CTTGTGACT	1.45833
GCCCGAGGT	1.45833
GTCCGTCCA	1.45833
CGAGTGAAC	1.45878
CACGAAGCA	1.42951
ACCCTTATG	1.46154
ACTTTAGAC	1.46154
ATCTCCTTT	1.46154
CAAGCGCCC	1.46154
CCAGGCCCT	1.46154
CCCGTCCTC	1.46154
CCGGTTGAC	1.46154
CGCATTCCG	1.46154
CTGCCTTTG	1.46154
GAGCTTCTC	1.49492
GCGCGCCAC	1.46154
GCGTCCGAA	1.58791
GCTAGTTCA	1.46154
GGGTCACGC	1.46154
GGTCCGCCC	1.46154
GTCCTTCAA	1.46154
TCCTGGGAC	1.46154
TCGCCAGCA	1.3141
TTAACCTTC	1.46154
GCCCCTCAG	1.46341
CCTAGAGGG	1.4953
CCAGTCGGG	1.46479
CCAGGCGGG	1.46541
CCCGGTGTC	1.46552
CCGGGGGAC	1.46575
ACTCTGTTA	1.57708
AGACATCCA	1.67451
ATTCCTCCA	1.34048
CCCGAGGAC	1.46667
CCTACTACA	1.46667
CCTTTGCCC	1.46667
CTCGGGCCC	1.46667
CTTGTGGAG	1.46667
GCCTTTGTT	1.34048
GGAACTTCA	1.46667
TCCAGGCCC	1.46667
TCTCCATCA	1.46667
ATCATGGGT	1.4669
CTAGTGGAC	1.46774
GCAGCTTCA	1.54017
CTTGTGTGG	1.46814
CATGGCTCC	1.46875
ACATGGGGT	1.38057
GCCGCCGGT	1.47015
CCATTGAGA	1.56863
CCCGTGATC	1.47059
GCTTTCACA	1.47059
GGGGCCCCC	1.47059
TCGCCTAAG	1.47059
TCGCTCGTG	1.47059
GCCCAGTGG	1.50444
CGGTCACGG	1.47143
GCGTATGCT	1.47979
ACAGTTCGA	1.62378
GCCCGGTGT	1.4717
GTCAGCTCG	1.47222
TGGCCCTGG	1.47222
GCAGGTCCG	1.47273
CTTGGGGAT	1.49649
ATTGCACGC	1.47312
AGCCCTCGA	1.47368
CCCGCACGG	1.47368
CCGATGGAC	1.47368
GCTTCTCCA	1.47368
GGCACCCAA	1.47368
GTGCCCCCA	1.47368
CCGTGGGTG	1.47463
GATGCTCTG	1.47541
GGACCCAAG	1.47541
ACCTGTTGT	1.55628
GGCCTCTCG	1.47619
CTAGGCTCA	1.47826
GGCTCCTCT	1.47826
TCCGTCTTA	1.47826
GGGCTCGTC	1.47917
ACCCTGGGC	1.48
CGCGCCGTT	1.48
GCCCTCCAT	1.48
GGCTTACTC	1.40667
TCCGAACGG	1.48
CCCACGGGG	1.48039
AAGGTTCCA	1.51397
GGCTCCTGC	1.48148
TTCCCATCA	1.48148
CCGCGCGGG	1.48333
CCTGTGTAC	1.48387
GAAGCCCGT	1.48387
GCCGCGACT	1.48387
TACCTCGTC	1.48387
TCACGTAGA	1.59042
CCTACCAGC	1.48485
GACCGGATC	1.62444
CGGTGTGGC	1.47892
GGGGCTCCA	1.48673
TTGGGTATG	1.49995
CTTGTGTGC	1.4876
GTCCTTTGC	1.4878
CCCGGGAGC	1.48837
CCTGACGGG	1.52593
ATGATGACC	1.4898
TGCTCAGGA	1.4717
CCGGATGAC	1.49057
GCCGTCCGG	1.49091
GCTGATGCG	1.49123
GGGTATGGC	1.50578
ACATGCAAG	1.51888
CTCTGCGGT	1.49351
TCAGTCACA	1.42447
CTCGTGGGT	1.49378
CAGGTGGGC	1.50519
GGGGTGGAC	1.50524
CCGTTGGGG	1.42722
AACGCAGAC	1.5
AACGCTACC	1.64583
ACCTGGCTC	1.5
ACGCCGCGC	1.5
ACGTTCTTA	1.63462
ACTTCTGTA	1.33065
AGTTTCTCG	1.61667
ATCCTTTAC	1.5
ATGCCATCC	1.65909
ATTTTGCCA	1.71875
CACGCTCCA	1.5
CATGGGTCC	1.5
CCAACTGGG	1.5
CCATGCTGT	1.5
CCCAGGAAG	1.5
CCCCCGGGG	1.5
CCCCGCCGG	1.5
CCCGGAAGA	1.5
CCGGATACC	1.44355
CCGGGGACC	1.60294
CCGTCACGT	1.5
CCTACCTTA	1.5
CGGGGCCCT	1.5
CTACGAGTC	1.60294
CTCGTCGGG	1.5
CTCTGGCCG	1.5
CTCTTGAAA	1.5
CTTCCCTAT	1.5
CTTGTAGCA	1.60294
CTTGTTGAA	1.5
CTTGTTTCG	1.5
CTTTGGACC	1.5
GATCCCCCC	1.5
GCCCTTACA	1.63462
GCCTATGCT	1.57609
GCGCCTTCT	1.5
GCGCTCCGG	1.55303
GCGCTGACC	1.4693
GGACTAAAC	1.60294
GGCCCGGCC	1.5
GTCCGCCCG	1.5
GTCGCTCTC	1.5
GTCGCTCTG	1.5
GTGCCCTGC	1.5
GTTGCTCCA	1.36538
GTTTACTTC	1.5
TCACCCGAG	1.43966
TCATCCGGC	1.5
TCCTCGGTA	1.36538
TCCTGCGGG	1.5
TCCTTTCTA	1.5
TCGCGACGC	1.5
TCGCTGGCC	1.5
TCGGTGAGC	1.51577
TCGTCTACG	1.5
TGCAGCTTC	1.5
TGCTCCTTA	1.5
TGTTCCCTT	1.5
TTCAGCGTC	1.5
TTCGTCCTG	1.5
TTTGCTCCA	1.5
CATGGATGG	1.43097
CCGGTGGAC	1.5042
CCGCTATTA	1.50538
AGTTGTTCA	1.53522
ACATGGGGA	1.49355
AGACCCGTA	1.44722
CCTGGCGGA	1.50847
GCCAGTTCC	1.50847
TCGCCACGG	1.50943
CAGCATGGA	1.49222
CCTGCGGCC	1.51064
GCCAAAGTC	1.54903
CCCCGTGAA	1.51163
TGTCTCCGG	1.51163
CGAACTCGA	1.5122
GCTCCCGCA	1.5122
GGGCGCTCC	1.5122
TCACATCTG	1.55641
CATGGGTAT	1.49775
TCATGGGTA	1.50395
AGTTTCCCA	1.55939
ATCATGACC	1.51351
GGTCCTCGA	1.51351
GTCCTGCTC	1.51351
TGCGGCTCC	1.51429
AGTTCCCGA	1.51515
GGTTCGCCT	1.51515
TTTGCGTAC	1.51515
CCCGCCGGG	1.51562
GCGGCTCTG	1.51613
GGTGCTCCT	1.51613
CCGGTCGGG	1.55394
CCGGAGGGC	1.51678
GGGTATGTC	1.51707
ACAGCGCGA	1.51724
GGGTCTCCT	1.51724
ACCCGTAGA	1.51852
CCAGGTGAC	1.51852
GTCCGCTCG	1.51852
GTGCCTCCC	1.51852
GTGAGCTCC	1.51887
CCGGTTGGG	1.52675
GTCCAGCTG	1.54179
AGCCCGGGA	1.55412
AGTTGCACT	1.76
CGCCACAAT	1.58692
CTACGGGCC	1.4475
GCCCGGAGT	1.52
TCCCGCCGG	1.52
CTATCGAGA	1.53436
ACATGGGTT	1.54406
CTCGGTGGC	1.49639
AGGGCTCCT	1.52174
CTACTAGCA	1.52174
TTCAACGAA	1.52174
TCCGTGGGT	1.53691
CGCCGTGGG	1.5293
CGCGCCGAA	1.52381
CTGCTTGTA	1.52381
GCCGTACGA	1.60281
ATGGAACCA	1.52632
CCGAGAAAC	1.76316
CCTCTTTCA	1.52632
CGTACCAGT	1.52632
CTTGAGACG	1.52632
GCCTCTTGT	1.52632
GTCACTGAA	1.69173
GTCGCCTGT	1.52632
ACCCGGACT	1.52778
ACGCGGTCA	1.52778
CGAAACCTG	1.5747
CTTGCAGTA	1.52778
GGGGTGCCC	1.52817
GACGTGGGT	1.53082
AGTCCCGGC	1.52941
CCACTAGGG	1.52941
CGAACTACG	1.62582
CTAGCCCCG	1.52941
CTCCCTGGC	1.52941
CTCTGCCAA	1.52941
GAGGAACCA	1.57899
GCGTCTCCT	1.52941
GTACGGTCC	1.52941
GTTGCTCTG	1.57899
TCCGTACGG	1.52941
TTGGGCAAA	1.55077
GGGCACCCT	1.5303
GGGTGGAAC	1.53453
TCGGTGAAT	1.54942
ACTCAGTTC	1.64167
ACTCCGGTA	1.53333
ATTGCTCGA	1.53333
CACGTCCTG	1.40952
CTCCGTGGT	1.53333
CTTCTAGTC	1.53333
GCTTTCCAG	1.64167
GGCCGGCCC	1.47356
GGTTGCTCC	1.53333
GTCGCGAAA	1.58925
TTTGATGAC	1.64167
TTTTCCCAC	1.53333
ACAGTCGCG	1.56385
ACCGCTCCC	1.53448
GTATGGGTA	1.57756
AGTGTGAAC	1.61189
CACGAGTCA	1.49329
CATGTTCAG	1.57782
TACCTCATG	1.53704
ACGGTGAAT	1.56684
CGGGGACGG	1.52575
AGCGCGACC	1.53846
CCCCCGCTG	1.39423
CTGCCGCTG	1.53846
CTTACAAAA	1.76923
CTTGCCGGG	1.60256
GAATGCGCA	1.58173
GCCTTCGTT	1.53846
GGCCGTCCC	1.53846
GGCCGTCGC	1.53846
GGGAGCCCC	1.53846
GGTCGTCCA	1.66209
TCATGGTCC	1.53846
TTTCCCATT	1.53846
CCGTGGGGC	1.52395
CTCGCTCTG	1.54
CTGTGGCCA	1.54
CTTGCTGAG	1.54
GCGCCCCTG	1.54054
TTAGTGGCC	1.54054
ACATGGGTA	1.52669
GTCCTTGGG	1.54098
TATCTAGCT	1.45153
AGCTCTCGT	1.54167
CTCATGCGT	1.54167
GACCACGAA	1.57696
GCCACCACA	1.54167
GTCTCCTTT	1.54167
TTCAACCTT	1.61083
GGGTATGAA	1.54182
ACCCGGAGC	1.54286
CCGTTCGGG	1.54286
CGTCTGCTC	1.54286
GCTAGCACA	1.54286
GACATGGGA	1.55381
GTGCCTCCT	1.54348
CTCGCAGGT	1.54386
CTTGGACCA	1.54386
GCGCCCCGG	1.54412
GGGGTATGT	1.5446
GAGGTGAGC	1.54992
ACCCGTTCC	1.54545
ACTGTCCCT	1.54545
AGCCCTGAG	1.54545
CCCACAGTT	1.54545
CCCGTTACG	1.54545
CGAGACCGG	1.4632
CGCCCGGAA	1.68939
CTGTTTGCC	1.54545
CTTCGGGAC	1.54545
CTTGTCCGT	1.54545
GCACTCCAA	1.54545
GGGTATGCC	1.54545
GTTCAGCCC	1.54545
TCCCTTCCC	1.54545
TCTGAGGAC	1.54545
TGCCCTGCA	1.54545
TGCCTGACC	1.54545
GGCTCCGGC	1.55469
TGGGTATGG	1.49613
GGGGCCGCC	1.54651
CCTGCGGGG	1.55479
GGAGCTCTG	1.54717
GCATGTACG	1.54762
GCTGCCTCC	1.54808
CCGACAGGG	1.60232
CGTCTTCAC	1.54839
GTCGTGGAC	1.54902
GCCCGGGTA	1.54918
CTGGTCCCG	1.55
GACAGCCAA	1.63214
GTGAACACC	1.55
TTCCCCCTG	1.55
CGGCTCCAG	1.55102
GCTGCGGCG	1.55102
GTACGGCCC	1.55172
TTCGCCGGA	1.55172
CTGCCAGGG	1.55263
GGGGCTCCC	1.55263
GGCCCAGGG	1.46501
GCCCGTGGT	1.52224
ATGTCCTCG	1.55556
CAAGCGCAT	1.48932
CCCCAGGGG	1.55556
CGCAGGGCC	1.55556
CTCGTTATA	1.55556
CTGCATGCA	1.55556
GCCTCTGCC	1.55556
GTCATGACG	1.61706
GTCTGCCCG	1.48932
GTGTCTCCT	1.55556
TCCTATCGG	1.48932
TCGCTCAGT	1.55556
TGTCACCAG	1.55556
ACACATGGG	1.53489
CTCCCGGGG	1.55814
GTTAGCCCG	1.55814
GGGGCTGCC	1.55833
TCGATCCAA	1.60798
TGTCCTATT	1.50668
CGAATAGAG	1.68741
CGCGCGTTA	1.59373
CACGGACGG	1.56098
GGGTATGGT	1.56456
GCTCTGGGT	1.5618
CAGCGCACG	1.6636
CGGGTGAGC	1.5625
CTCCTACAT	1.5625
GCTCTTCGC	1.61458
GGGCTCCCT	1.5625
GGTGCCCCA	1.5625
GTCCAAATC	1.6636
TCAGCCCGA	1.75347
TTAAGGACC	1.5625
GCCCGGGTC	1.56322
AAGGTGAGC	1.58111
GGGGCCCTA	1.56522
ACGCTGGCC	1.56604
TCGGTGTAC	1.56643
CCTTGTGCA	1.56667
GCGGAGACC	1.64841
GGGGCCTCG	1.56693
CCCGCGGGG	1.54116
GTGTCTCTG	1.61273
AGTTCTCGA	1.56863
GTACGACCG	1.60162
CACATGGGG	1.56881
GGGGACCCG	1.56989
CACGCCCAA	1.68571
CATCTACCG	1.78571
CCAGCAGGG	1.60571
CGGTCGATC	1.68571
CGTGTCGCC	1.57143
CTCATACTT	1.63054
CTCATCCTT	1.64935
CTCGGGAAC	1.63054
CTGGGCACA	1.57143
GAACAGCCA	1.61905
GCCGACCCC	1.57143
GGACTCCGA	1.57143
GGCCTGCCG	1.57143
GGCTCCCGC	1.57143
GGCTCCGCA	1.57143
GTATCACCT	1.57143
GTCTCGCCG	1.57143
TCAGTGACC	1.57143
TCGCAAGAG	1.50794
TCTAGCCTA	1.57143
TTAATGCTC	1.68571
TTCCTTCTC	1.57143
CCCGGTGGC	1.57317
CTGGTGTAC	1.65286
CAAGGACGG	1.57407
CCCCGGGGG	1.5925
GACCCTCTA	1.57447
ACTACGCAA	1.66429
AGGGCTCCA	1.57534
GCAGCCCCT	1.57534
ACCTTGAGT	1.67359
CTCCCCGTA	1.57576
GCAGCGTAC	1.57576
GGGACGCCT	1.57576
CTGACAGAG	1.54676
GGGTATGTA	1.7747
AGGGCACCA	1.57692
GAAATCTCG	1.57692
GCCGCCAGA	1.57692
GCCTGCTCG	1.57692
TCAAGATCA	1.50846
ACCCCGGGC	1.57895
ACGACCAGA	1.57895
AGCAGCTCT	1.57895
AGCTTTCAA	1.57895
CAGGCGACC	1.57895
CGCAGTACA	1.57895
TCGTTTCCA	1.57895
GTCGGCTCC	1.58065
CTTGGCGAG	1.58084
TTACTAGAC	1.58209
AGCATGGGT	1.57487
ACCGCGATA	1.58333
CCTGCCAAT	1.58333
CTGGCTCCA	1.58333
GCCGCCTTG	1.58333
GCCTGCACG	1.58333
TGTATACCC	1.71474
TTGCTCGTA	1.50906
CCGACGGGG	1.58462
GACAACTCG	1.58491
CAGGGAAGG	1.62136
GTCTCTTCG	1.62602
TCGGCTAAC	1.58571
TACGTTTAC	1.58621
TCCCGGAAC	1.52525
TGCCCGGCA	1.58621
CGCACGTTA	1.65806
ATTTGTTCC	1.7678
TCCGTCGAG	1.58824
ACCTCACTC	1.59016
CTTTACGGG	1.59091
GCTAATACA	1.73295
GTATCCAGT	1.66502
TTACGAGAA	1.50974
CACCGAGTA	1.51932
CCAGGAACA	1.61746
GTCCAGGCC	1.59259
TCCCTCGGG	1.59259
TCGCCGGTT	1.59259
GACAGCGAC	1.64536
CTTGTGGTG	1.58143
GGACATCCG	1.61853
CCGGGTGAC	1.59494
TTACTGCGC	1.63483
GGGCTCCGT	1.66522
TCCTCGGAA	1.59574
GCCGGGGAC	1.60558
GCCCGGGTT	1.59701
GTTCACCTA	1.59756
CCTTGTGTG	1.5977
GGCTCCGGA	1.5977
TCTGTTCAA	1.58022
ACCTTACAC	1.75455
ACGTTGCGC	1.68095
ACTACCGGT	1.64722
ACTCCGAAG	1.63696
ACTGCCCAT	1.6
CAACCGGTG	1.6
CAAGGAGGG	1.61126
CAATCCAGA	1.68095
CACTCGGTG	1.64722
CATCCCTTT	1.75455
CATCTTCGA	1.78214
CCCATTGTA	1.6
CCGTCCGGT	1.6
CCGTCGCAT	1.51053
CCTAGCCAG	1.6
CCTCGCAGG	1.6
CCTGCCTGT	1.6
CGCAACGTA	1.57848
CGCAGGCAC	1.64722
CGTGGGTCC	1.6
CTCCCCAAG	1.6
CTGGCCCGA	1.70625
CTGTATACC	1.6
CTTGCAAGG	1.6
CTTGTGGGC	1.6
GATCTCCTT	1.6
GCAGAACGC	1.6
GCCAACTCG	1.68095
GCCCCCCAG	1.66538
GCCCGTAGT	1.6
GCGCTTGCA	1.75455
GCTCCTCCA	1.6
GGCCGCCCG	1.6
GGCCTCGTT	1.56852
GGGACATCC	1.6
GGTTCTCGC	1.6
GTCTTTTCC	1.6
GTGCCGTCC	1.6
TCCGTCCGA	1.6
TCCTGGTAT	1.6
TCGCTCCTG	1.6
TCGGTTCCG	1.6
TCGTCTCTC	1.6
TGCCCCGAC	1.6
TGGTTTCCC	1.6
TTACAGCCG	1.45217
TTCACCTAT	1.75455
TTGCCGACC	1.6
CAGTGGCCG	1.60127
CCCAGGGGG	1.60251
TCGACTGGA	1.57915
ATCTTAGCA	1.50189
GAGCTGCTC	1.60377
GGACACAGA	1.65294
CCTTGGTTG	1.63882
CCCATAGGG	1.60563
CCGGCTGGG	1.61088
GGGATGACC	1.57828
CCGTGGGGA	1.61464
TCGTCGAAC	1.60674
CAGGAGAAC	1.60714
CCTGCCCTT	1.60714
CTATGCCTA	1.60714
CCCGTAGGG	1.60784
GCCGCTAGG	1.63072
GCGGCGGAC	1.61537
AAGCCCGCA	1.6087
CTCAGGGAC	1.6087
GCCCGTCGG	1.6087
GCTCGTTCT	1.6087
TCTAACTCG	1.6087
TGTCCAACC	1.6087
TTTATCCAA	1.63546
CTTGAGCTG	1.65012
GACACCCCG	1.60976
CCTGATCTG	1.61111
CCTTGGACA	1.61111
CTCGTCGTT	1.61111
GCGGTTCCC	1.61111
GGCGCCTCT	1.78056
TGTAAGACC	1.61111
TTATTTACA	1.78056
CGGGGGAAC	1.6113
CAAGAGCAA	1.74008
AAGAAAGCC	1.71213
CTGCATGGG	1.63207
CACTGGGTA	1.6129
GCTCGGACA	1.6129
GGCGAGACC	1.55645
GGGACCTCG	1.66583
GGCGTCCTC	1.61364
TTGTTCTTT	1.65126
GGCGTTTCA	1.64322
CCGTCCGGG	1.61458
ACCAGGGAC	1.84103
ACTTGCGAA	1.47436
CAGCCTTCA	1.61538
CTACGGGCA	1.61538
GGCACCCTT	1.61538
GGCCCCCAT	1.61538
GGCTCGCAA	1.61538
GGGCCGTCC	1.61538
GTCCTGCGA	1.61538
GTCCCGGTG	1.61702
GGGTATGTT	1.64565
CGCAATCAA	1.79461
AGGGTGAAC	1.6009
CCGGTGGCC	1.61765
GTCGTCCGA	1.61765
TCCGGGAAC	1.61765
TTCAACCGC	1.7116
CGACCAGCA	1.5791
TTCGTCCAT	1.61818
GTCGTGGGT	1.81077
GCCCAGGTG	1.59588
GGGGTGGGC	1.61974
CAGCCAGGC	1.61905
CATCCGGCG	1.61905
CCCTTTGGG	1.61905
CCGCAACAG	1.61905
CTGCTTAGA	1.53452
GCGCAAGCG	1.61905
GGACCACCG	1.61905
GGCTCCGAG	1.65836
GTCGTCTCT	1.61905
GTTCGCCTC	1.61905
TCCGCGGAG	1.61957
CATTGTTCC	1.62069
CCCCGGTAC	1.62069
CGTCGAGCA	1.56034
GCCCGCAGG	1.62069
GTTGGCTCT	1.62069
TCCGGTGAA	1.62069
TCTGGACAT	1.62069
GGGTATGGG	1.62963
CGTATTCCC	1.62162
TGGTCTCAC	1.62222
CCGGAGGGG	1.62428
ACGGATGAC	1.53618
ACTACAGAG	1.67061
AGCCGGACC	1.625
CCAGTGAAC	1.625
CCCATTGGT	1.5125
CCTTGTGCG	1.72426
CGATGCTCG	1.625
CTCGAAGAC	1.625
CTTGGTGCC	1.625
GGACGCATC	1.625
GGGCTCCAG	1.5891
GGGTCCTCG	1.6925
GGTCAACCA	1.625
GTCCTTGAA	1.625
GTTTTCACA	1.57056
TACTTCTTC	1.75481
TCCGAATCC	1.625
TCGGCTCCA	1.625
TCTGGGCTC	1.57056
CGGTTGAGC	1.60763
TTGACTGAA	1.62712
ACGGTGAGC	1.64802
GCACTAACC	1.62745
GCCGCCGGC	1.62857
GCTCGCGCG	1.71969
CTCGGGGAC	1.62887
CCGGGGGGC	1.56884
TGCCTAGTC	1.62921
CCGATCGCA	1.62963
CTCGCAGGG	1.62963
CCGTCCGAT	1.63043
GCATGGGTT	1.63063
CGCAGGTTA	1.65629
GCCCACTGG	1.63077
TCGAGCGTA	1.63077
CGCATGGGG	1.63095
AGCGGCTCT	1.67476
CCTTGTTTG	1.63158
CGACCCAGA	1.63158
CGGGCCCCG	1.63158
CTGTTTGCA	1.63158
GCGTCGCCT	1.63158
TCCTTCGCG	1.63158
GCCCAGGAG	1.65132
CTCTGGGCC	1.63235
CCGGCGGGG	1.54466
CCTAGGCAC	1.63265
GGTGGCTCC	1.63309
ACCCAATGC	1.73854
GCCGCCTTC	1.68763
GCGGTGAAC	1.68763
CCGGGAGGG	1.63024
TCGGGGGAC	1.63359
GGGTATGGA	1.62994
CGTCGTCCT	1.63462
GTATCGCTC	1.72876
GCCGTGGGC	1.65276
ACAGGACAC	1.63636
AGCTCGTCC	1.63636
ATAGCCTTA	1.70949
ATTCGGTCC	1.77652
CCATGTGGG	1.63636
CCTACTCCA	1.63636
CGCCCTCTG	1.63636
CTCTTTGCT	1.63636
CTTCTAAGG	1.63636
GGAAGTTCC	1.63636
GTAACGATT	1.68583
GTGTCTCCA	1.63636
TTTGGTCTA	1.63636
GGATTAAAC	1.65826
CCGTGGGGT	1.64629
CTATGGGTC	1.63793
CCAGTATCG	1.68431
CCATGCGGG	1.66938
TCGGTGTGC	1.63964
GGGTGGCCA	1.62726
ACAGCCTTA	1.64
CTGGCTTCA	1.49391
GCGCTCCAG	1.64
GGCCTTCCG	1.64
ACTCGGTCA	1.64103
CGCAGGACC	1.64103
GCTCGTCTG	1.64103
CCATCAGCG	1.67261
CCCGTGGGA	1.70194
CGTAGAGCA	1.64211
GCCGTGGGA	1.64211
CGGGAACGG	1.65178
ACCTTAGGA	1.58069
ACTACGGTG	1.62943
CCGAGTCAC	1.64286
CCTACTAGC	1.64286
CGCATGGCC	1.64286
CGCTCTCGC	1.64286
GCACCCCCG	1.64286
GCCCACTGC	1.68189
GCCCTAGGC	1.64286
GGGCCTCCG	1.75476
GGGCGCCAC	1.64286
GGTCTCGTC	1.64286
GTAGCCCTA	1.64286
TCGTTCAGA	1.58069
TGCCTTGCC	1.64286
TTGCGTCAC	1.70074
CCCTGTGGG	1.64444
CTTACACGT	1.64444
TTCTCGTCG	1.64474
CAGGAAAAC	1.69758
AGTGCATAC	1.7402
CATCGCACT	1.64706
CCCATCGGG	1.69496
CCCGTCGGC	1.64706
CCGAGAGGG	1.61973
CCTTGGTTT	1.64706
CTGGGACAC	1.64706
GAATGCTCC	1.59626
GCAAACCCC	1.64706
GGGGCGCCT	1.64706
TCCTCGGAG	1.7402
TGCTGCTTA	1.64706
TTCGCTATA	1.64706
TTTATGCCG	1.59626
TCCCGGTGC	1.64865
CTAGTAACT	1.66155
ACGAGTTCA	1.72976
AGTGACTCG	1.72976
GCCCCAGGC	1.56184
TCAGACTTA	1.65
TCGGGCTCA	1.65
TTACGCCAC	1.65
GGGTATCCG	1.63018
CTCATAAAC	1.72558
ACTTCTTCT	1.65217
ATGATAGCC	1.65217
CCGGTTCTT	1.65217
CGTGGCCAA	1.67017
GCGCTGGCC	1.65217
TGCTTAGTA	1.72192
GAGCCAGCA	1.68653
GTAATACCT	1.71869
ATCGGCCGT	1.65385
GGGGCTCTA	1.65385
GTGCTTCTC	1.65385
GGGCATGGG	1.65157
GTCCTGGTC	1.63341
CCAGCATCT	1.85789
CGCAAGGCA	1.62583
CGCCCCCGG	1.65517
CGCCTCTCA	1.65517
CTTGCGGCG	1.65517
GACTTCTCG	1.65517
GGACATAAC	1.71092
TCCACGGAG	1.71092
GCCCAGCAA	1.65605
GTCTTCTCG	1.65625
TTAACGTCA	1.65625
GGGTATGAG	1.6616
CCGTGTGGC	1.65672
AGCGTAACC	1.65714
GCTACACCA	1.74749
AGGACCACG	1.80705
AGGCGACTA	1.73625
CTAGTTGTA	1.73625
GGGCCGCAC	1.65854
CCCTGGGGG	1.65882
TCATGGGTT	1.67825
CGTTACCAC	1.65909
GCTTTTGTA	1.62024
CCGAGGGGG	1.65985
GCCCGGGTG	1.69176
CCCAGGTGG	1.66087
GCCGTGGGT	1.66176
TACGGAACT	1.66197
GTGGGTATG	1.6735
GATGCAGCA	1.66393
CCGGCCGGG	1.66518
ACCCGGAAC	1.66667
ACCGTTCCG	1.66667
ACCTGGTGC	1.69048
AGAACCCGC	1.66667
ATGGACGAC	1.71171
CAACGCTGT	1.79487
CAAGCCCCA	1.66667
CACGCCTTA	1.66667
CAGCATTCT	1.66667
CAGCCTGGA	1.73333
CAGCGCTTA	1.61905
CAGCTCTGT	1.61458
CATCTACAG	1.75439
CATGGGTTC	1.66667
CCAGTCTGC	1.66667
CCCGGAGGC	1.66667
CCGAGCGGG	1.66667
CCGTTAGGG	1.66667
CCGTTTACT	1.68776
CGCCCCGAG	1.66667
CGGAACCCT	1.66667
CGTCTTGGA	1.66667
CGTGTGGCC	1.66667
CTAGGCCCT	1.66667
[truncated: 150,345 more rows]
